# Supplementary material for: A Global Transcriptional Switch between the Attack and Growth Forms of Bdellovibrio bacteriovorus
Source: PubMed Central journal article supplement (PMC3627812; doi:10.1371/journal.pone.0061850), 2013-04-16

**Figure S1. Potential secondary structures in APsRNAs, as predicted by RNAfold**

>APsRNA1

```
TTATAGTTTCAGACACATGGACGTGTTTAAAACGCGGGGAGGGTGAGAAAGAGATCGCGAACCATGGAAGGTCAAG  
AGTCAAAGTTTCTCGCAGGAAACAGGAGCAATAGGTCAGCAGAGATCACGGAGTGATCAACACGAGCCGAGCTA  
CACTCTCAGAATCGAGTGCAGGATGCACATGATTCTCCGACTCTAACTCCCCTTT
```

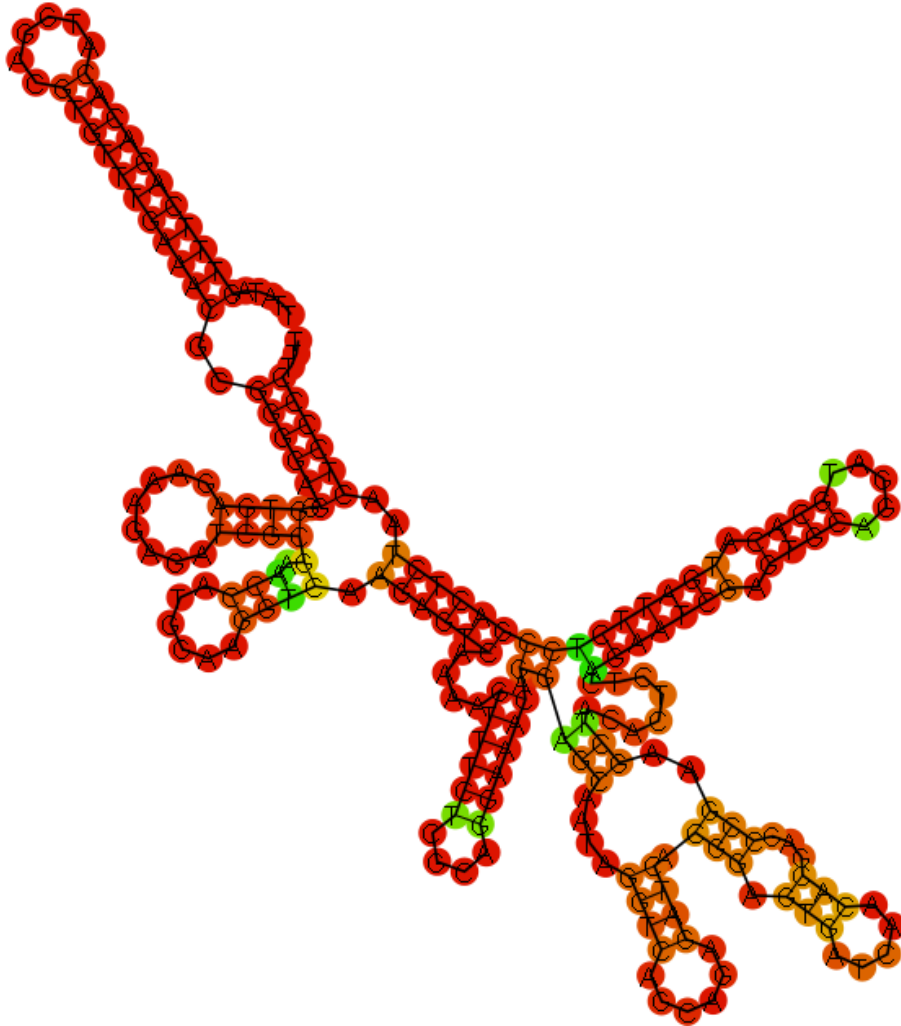

>APsRNA2

AAGCTTCTATTGGGGCTGGTAAGGAGGTGATGCTTATGGTTAAAAACGTAGACATAACCAAGGCGGAGGTGACGTC  
CTCTTAGGACGCCTAGACCTTCGCCGAGGGTTCGAAAGAATCATAAACCTAAGAGCGA

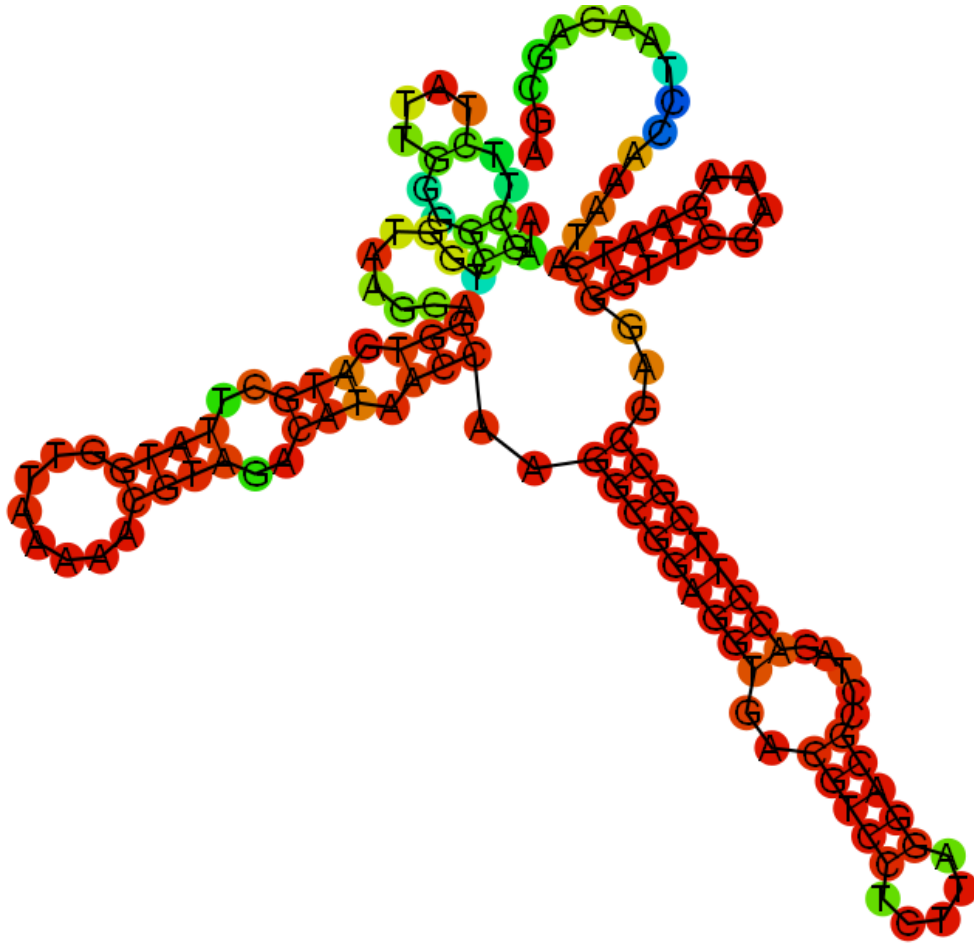

>APsRNA3

ACGTTGGCAAGCTAAAAAGGATCTCCAGATCAAATCAGGATACCTCCTCGAAGCTCAAGCTCCTCTCAAGAAA  
CGTCCAATCACCGTTTCTTAAGAGGGGCGGCTCCAACCTAAATAAATTTTAA

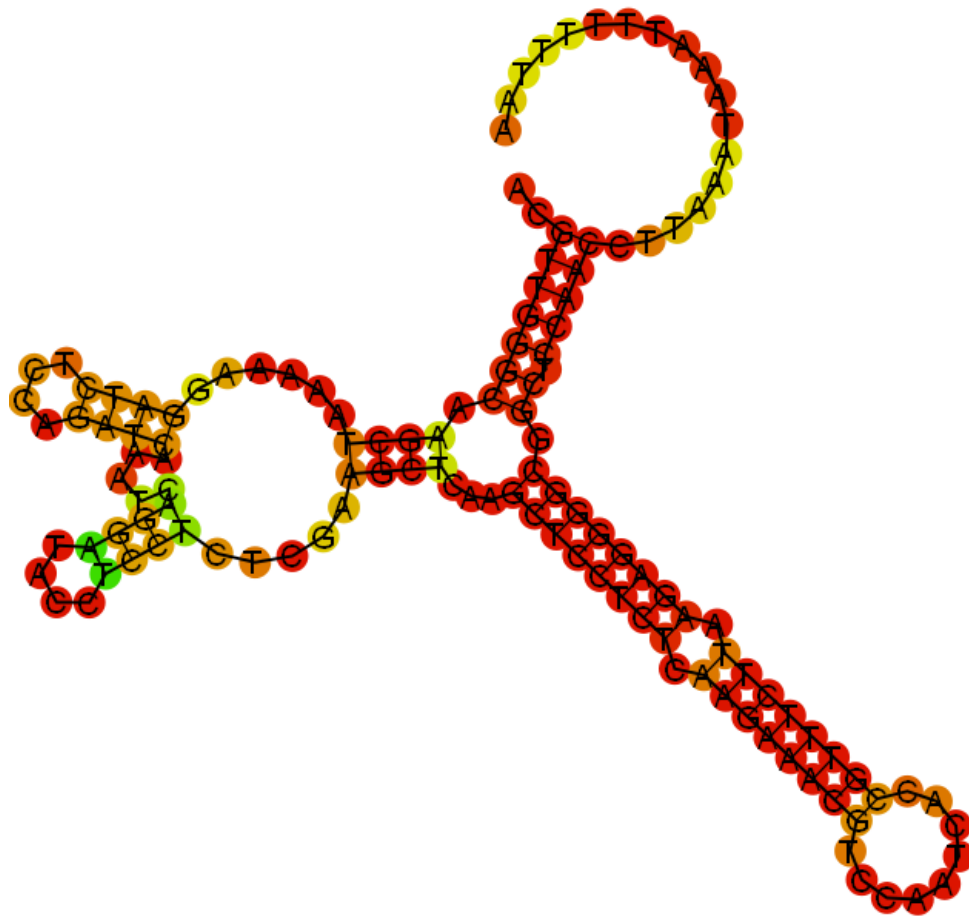

>APsRNA4

ATAATATCAGCGTAAAATATTTAAGATTCACATTCGCGATTACGGAATGTCGGGAGAAGCCTGTTCTGGGATAAGG  
CTTCTCTCGGGAAGAGGGGTCGCC

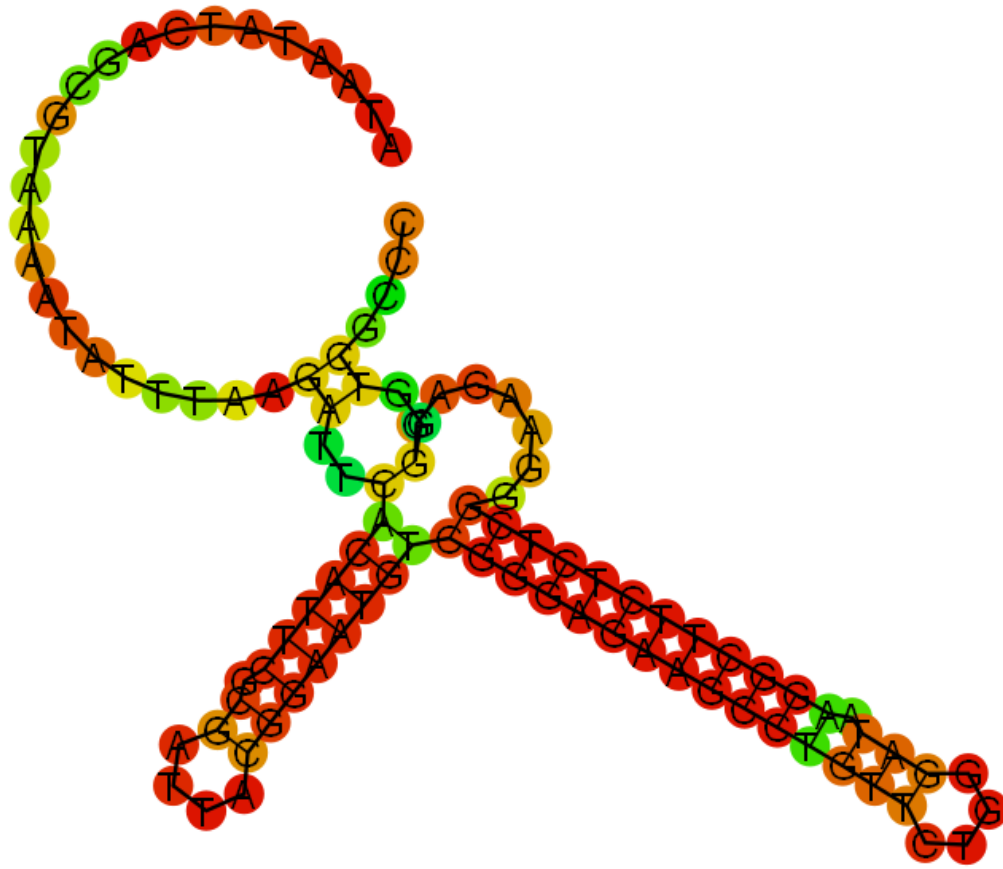

>APsRNA5

GAACCTCGGGTTAGGTTCTGCGAAAGGAGCCTTGAATGGCTAAAAAGCATGTCGTACGTAAGGAATATATCTGGAA  
CCGGGAGATTCGTGAATTGGCTCTCCTGACAGAGACGGGTCCACCTTAAGTGACAAGATCAGATTTTTGATTGGTG  
ATTAATAAAAAACCAGAGCGAATAAGGCGCCCTGGTTTT

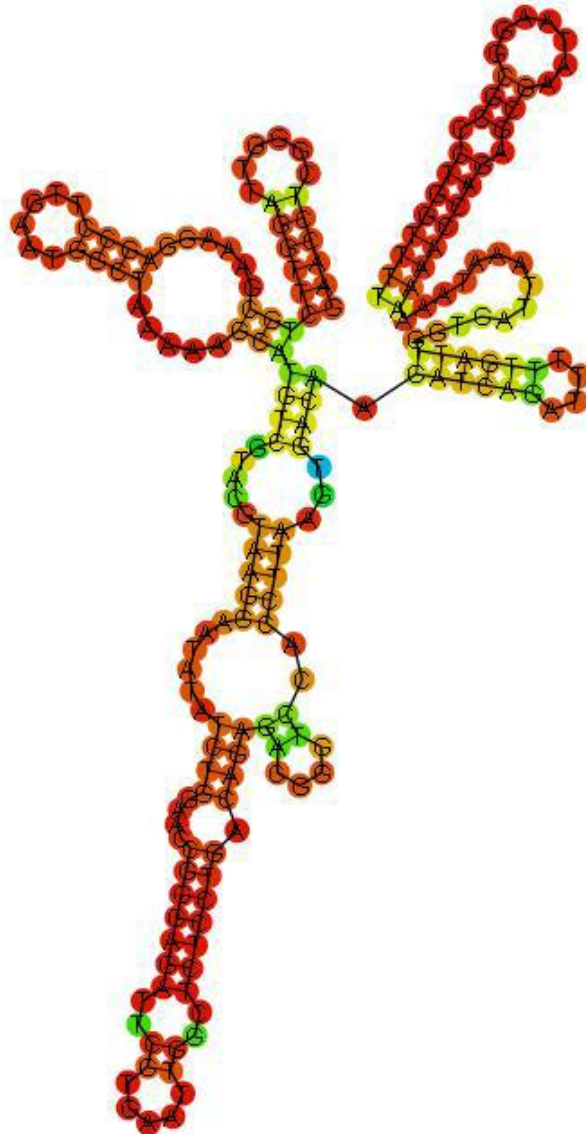

>merRNA

```
CAAGGCTCGGGAGACTTACCTCGGGTAAGTGAACGCTAGTAGGGCCAAGCGAAGGAGGACACGGATGAGAACACAT  
GAACATCACGATGACGAACTGAAGTGAAGATGCGTCACCAGGATTACTACAAAGAGGTTGGGTTTCATGCCTCTCTA  
AAGAAGAATGGACTGGTTGGATCTGATGAATAACTCATAAGGAGGTTCCCTAGGGTTATACTCGTTAGGATATAGAT  
CCTTCCTTTGCCTCAAGGCAAACCGTCGAAAACGGCGGACGCAAAGCTAAAGGGGTGTCGGTGCAAAGCCACGCC  
AGCCAGCTGCCAAAGGTCATGAGTCACCTGAGGAATCAGAGGTGTGCATATGGAAGGAACAAATACATACAAGGAT  
TGGTTTCATTCCCCTTAGCTAGCGAGTTATCACTGACGATTCTCGCTAGCACTTTTTTTGGCGA
```

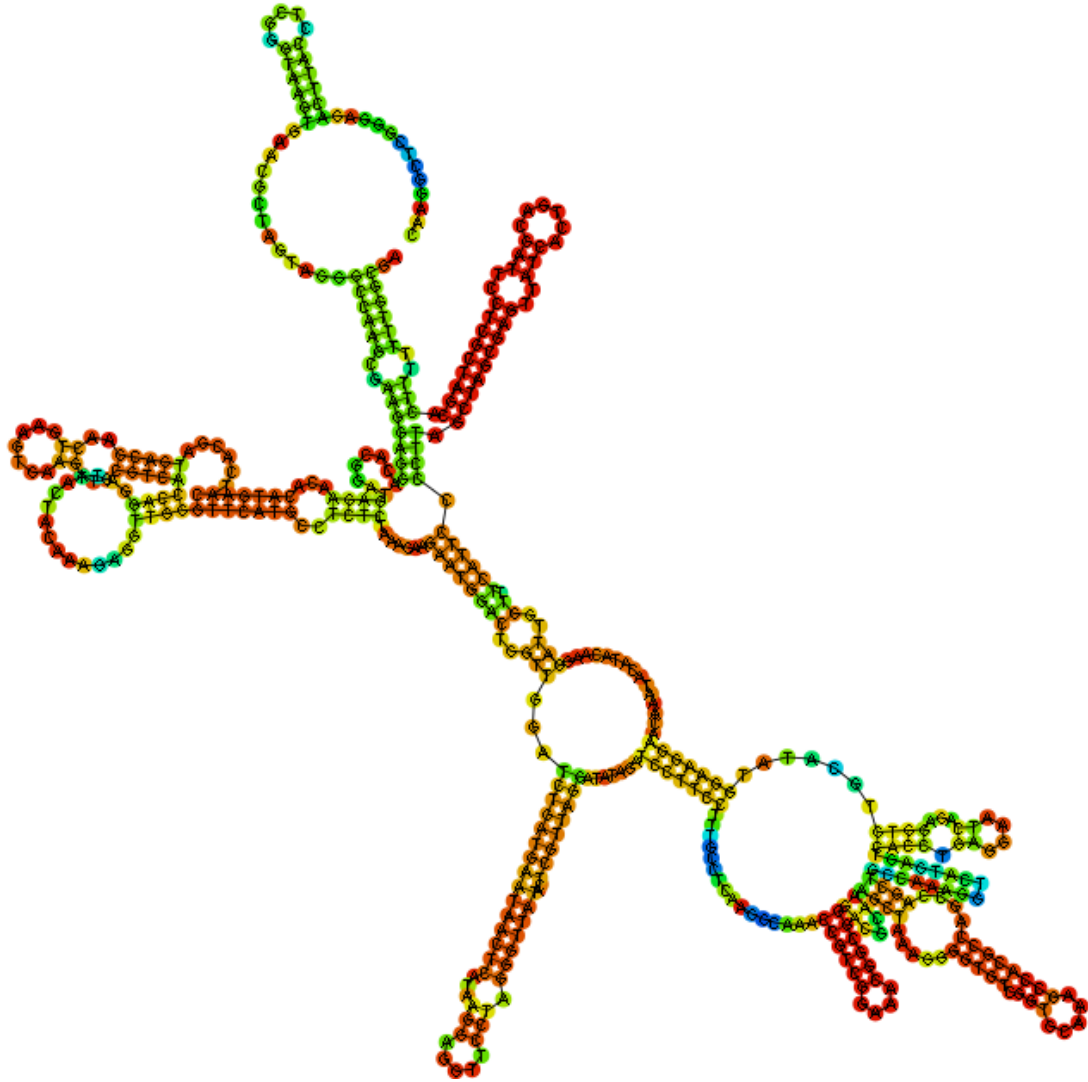

>APsRNA6

```
GAAATAACCAAAATAATTGAACGTAGGTGGTGGTTATGAATACGGAGCTTGGCGCATTTCGCGCTCAGGCAGGTGCT
TGCCTCAACAGCAGTTCTTGGGCCGATCTTAATCCTGATCGGACTCTGCTACTTCCTCTTTAACCAAAGCAGAAGA
AGCGTGACCTTATACATAGGCACGGGGTTGATTCTGACCGTCATAGGAGTCACCTGTTTGTACTCCGAACCTCGAA
GCGAAGATTCGCGGGCTCACCATGAAGCAGCCATCGAACAGGTCGAAGTCATCGCGGAGGAAGCTGTTTCGGAAGTA
GTTTCTGAATTGCTTGGTCCGTTTTGGCGCGGGGATTTGCTGGCGAACTTGGCCAGTCCCAGCGCTACGGGGGACG
CCGTCCGGGCTCAGTTGTCGTTTCGGCCCGGGCCGAATGCGCGCCATCCAGGCGCCGACAAAGCCCCCTTCGGG
CTGGCACTGTCCAAGCTCACCAGCAAACCTGCGTTGTCCAATCAATTCAGAAACAACCTCCGAAAATCCCATCAC
AAAGACATCGGTTCCAAAGGGCATCGTCGTGCACCTGCGCAGTTAAGAACACATTGATAGTTATTAGCTATTTCCG
ACTGGAACAATTTGGATGGGGACTTGAGGGAGCCCCACGCAGCGGTC
```

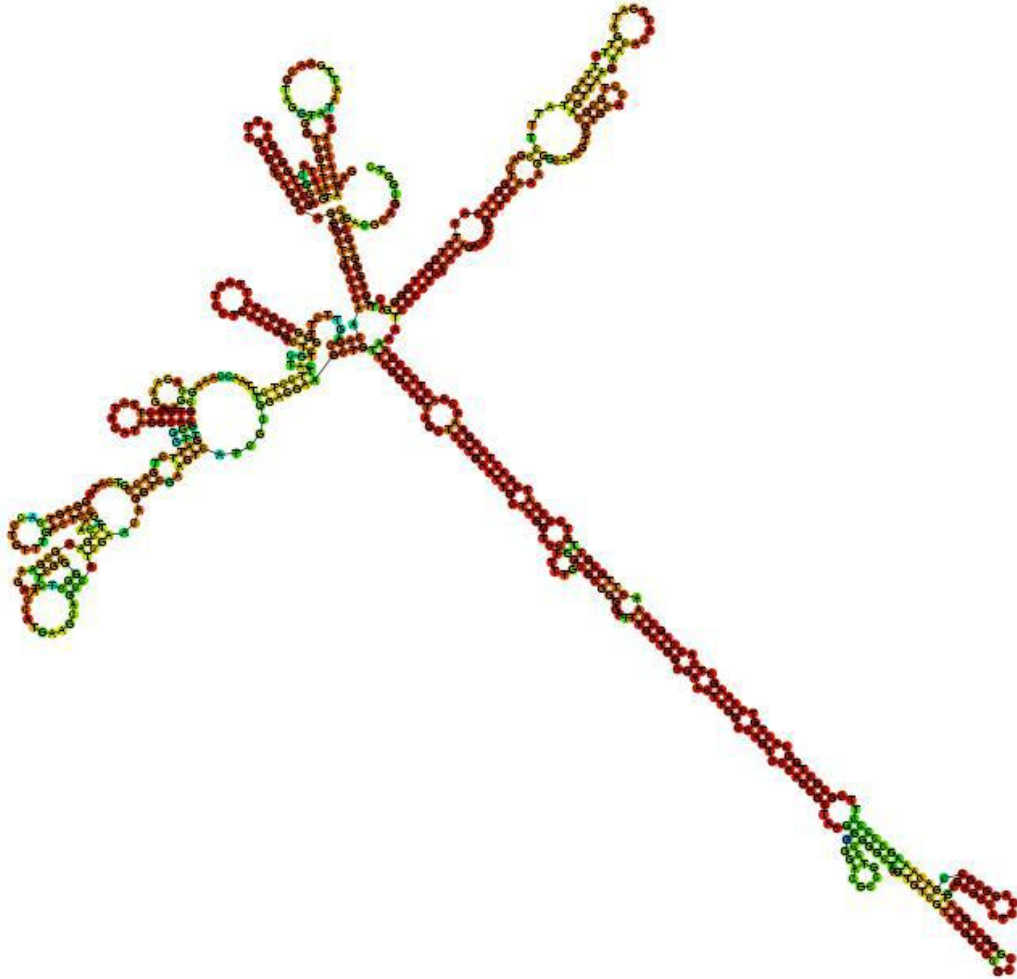

>APsRNA7

```
GTGTGACCATTAGGACTCAGTGTGGAGGCAAGTATGTTGAATAGAGGTAGTTTTAGTTTTCGTAGCGATGCTGGTAA  
TCAATCCCGTCGTGATACTGTTTTATCAAACTGCTCGATGGCGCCGGTAAGCCACGCCAAAACTCCACACCAAT  
CCCTGTGATCACCCGCCAAGTGGCTTCCGAGTCACAGCCGGTGGTTGCCGATATCAAACCGGTCTGCCACGACGAA  
AAGAAAGAATGCCACGTAAGGAATAATATCTTTACGTGCATATCT
```

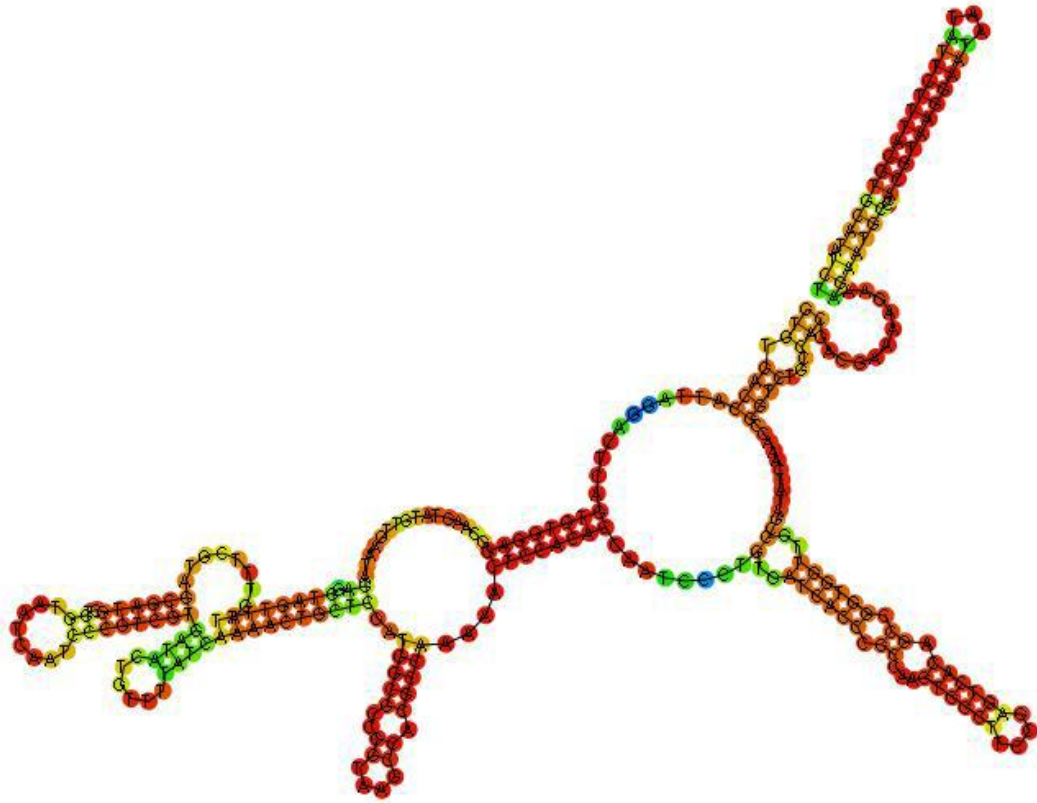

Supplement: pone.0061850.s001.pdf [file pone.0061850.s001.pdf]
